# Supplementary material for: Dendronized delayed fluorescence emitters for non-doped, solution-processed organic light-emitting diodes with high efficiency and low efficiency roll-off simultaneously: two parallel emissive channels
Source: PubMed Central journal article supplement — Chem Sci. 2016 Apr 26;7(8):5441–7. doi: 10.1039/c6sc00943c (PMC6021754; doi:10.1039/c6sc00943c), 2016-04-26
Supplement: SC-007-C6SC00943C-s001.pdf [file SC-007-C6SC00943C-s001.pdf]

# Electronic Supplementary Information

## Dendronized Delayed Fluorescence Emitters for Non-Doped, Solution-Processable Organic Light-Emitting Diodes with High Efficiency and Low Efficiency Roll-Off Simultaneously: Two Parallel Emissive Channels

Yifan Li, † Guohua Xie, † Shaolong Gong, Kailong Wu, and Chuluo Yang\*

Hubei Collaborative Innovation Center for Advanced Organic Chemical Materials, Hubei Key Lab on Organic and Polymeric Optoelectronic Materials, Department of Chemistry, Wuhan University, Wuhan, 430072, People's Republic of China

**Table S1.** Thermal, photophysical, and electrochemical data of the materials

| Compound | $T_d/T_g/T_m$<br>[°C] | $\lambda_{abs}$<br>[nm] <sup>a</sup> | $\lambda_{ems}$<br>[nm] <sup>a</sup> | FWHM<br>[nm] | $\Phi_{PL}$<br>[%] <sup>b</sup> | HOMO/LUMO<br>[eV] <sup>cd</sup> | $S_1$<br>[eV] | $\Delta E_{ST}$<br>[eV] |
|----------|-----------------------|--------------------------------------|--------------------------------------|--------------|---------------------------------|---------------------------------|---------------|-------------------------|
| CDE1     | 471/283/313           | 289,299,349                          | 520                                  | 91           | 77                              | -5.12/-2.54                     | 2.69          | 0.11                    |
| CDE2     | 507/289/367           | 289,298,348                          | 499                                  | 89           | 75                              | -5.25/-2.69                     | 2.84          | 0.15                    |

<sup>a</sup> Measured in the film; <sup>b</sup> Fluorescence quantum yields in solid state films, measured on the quartz plate using an integrating sphere; <sup>c</sup> Determined from the onset of oxidation potentials; <sup>d</sup> Deduced from HOMO and  $E_g$  estimated from the red edge of the longest absorption wavelength for the solid-film sample.

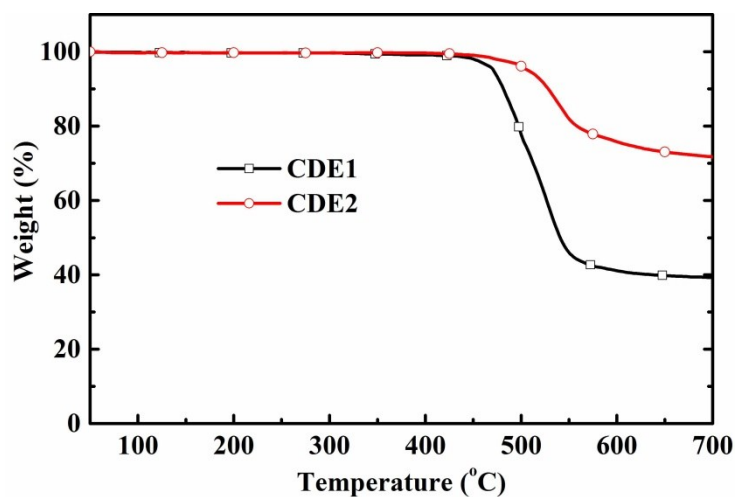

**Fig. S1.** TGA traces of CDE1 and CDE2

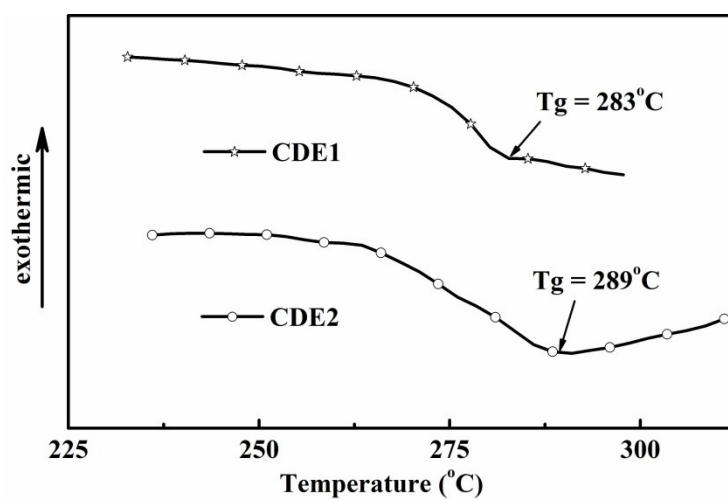

**Fig. S2.** DSC curves of CDE1 and CDE2 measured at a heating rate of  $10^\circ\text{C min}^{-1}$  under  $\text{N}_2$ .

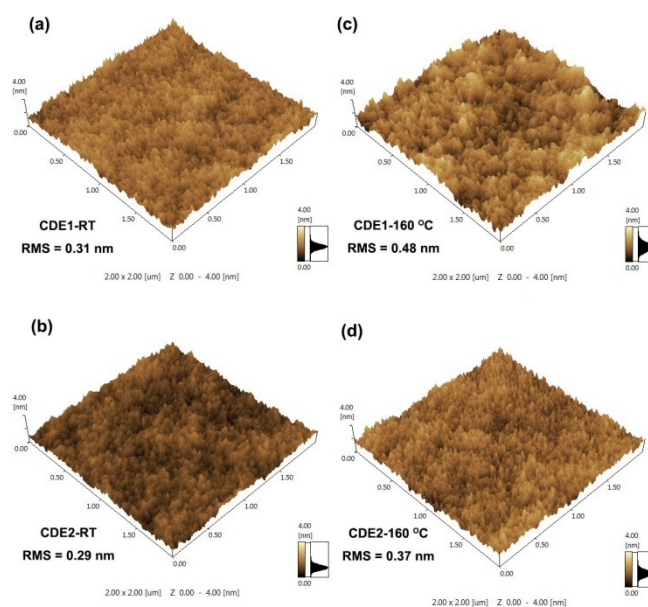

**Fig. S3.** 3D AFM topographic images of the as-cast films of CDE1 (a) and CDE2 (b), and the annealed films at  $160^\circ\text{C}$  of CDE1 (c) and CDE2 (d).

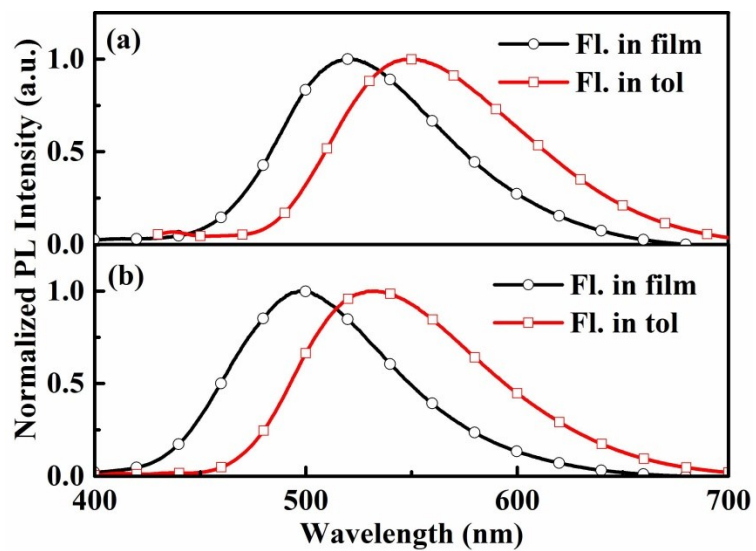

Fig. S4. The fluorescence spectra of CDE1 (a) and CDE2 (b) in film and toluene ( $1 \times 10^{-5}$  M).

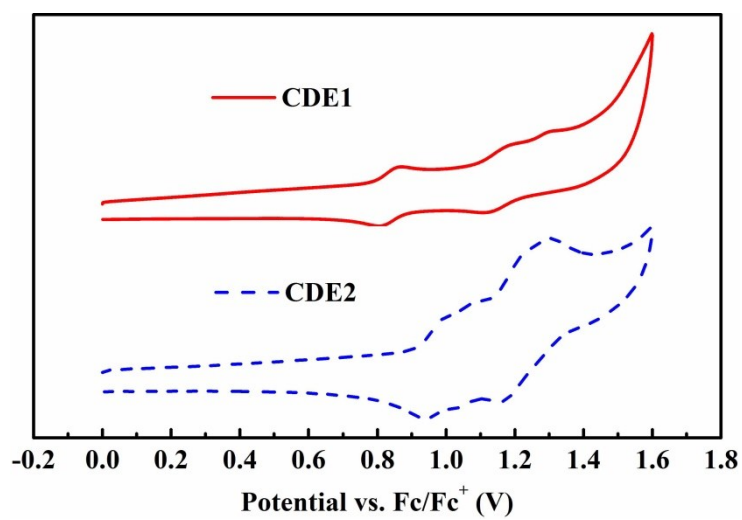

Fig. S5. Cyclic voltammograms of the materials in CH<sub>2</sub>Cl<sub>2</sub> for oxidation.

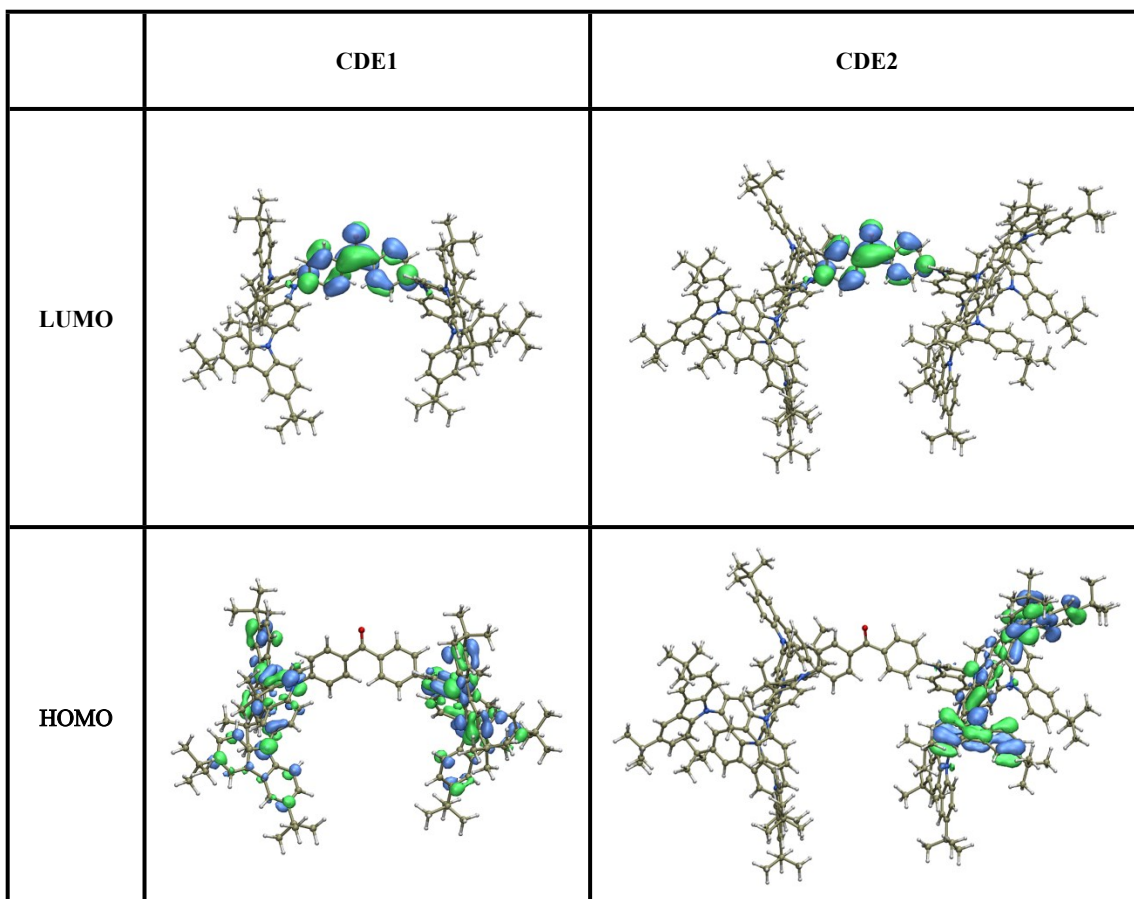

**Fig. S6.** HOMO and LUMO distributions in the two dendrimers calculated at the b3lyp/6-31G(d) level of theory.

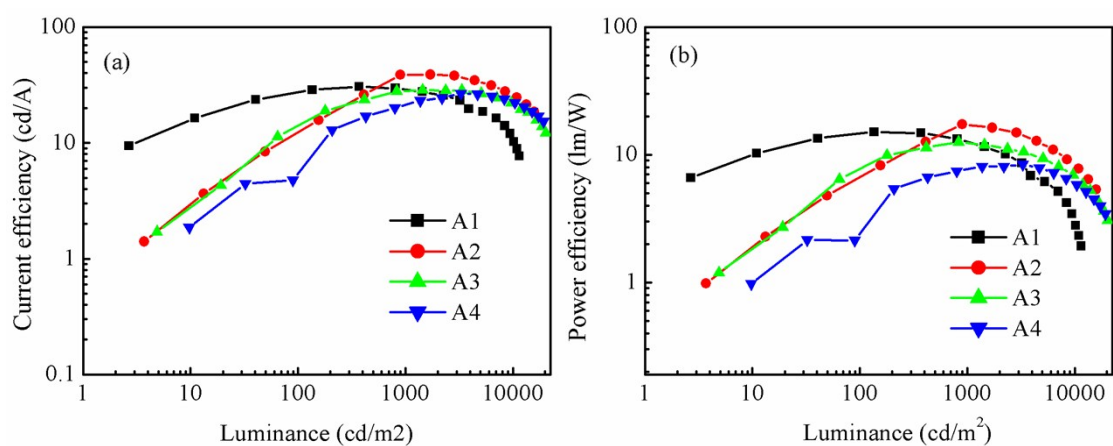

**Fig. S7.** (a) Current efficiency versus luminance curves, and (b) power efficiency versus luminance curves for Devices A1-A4.

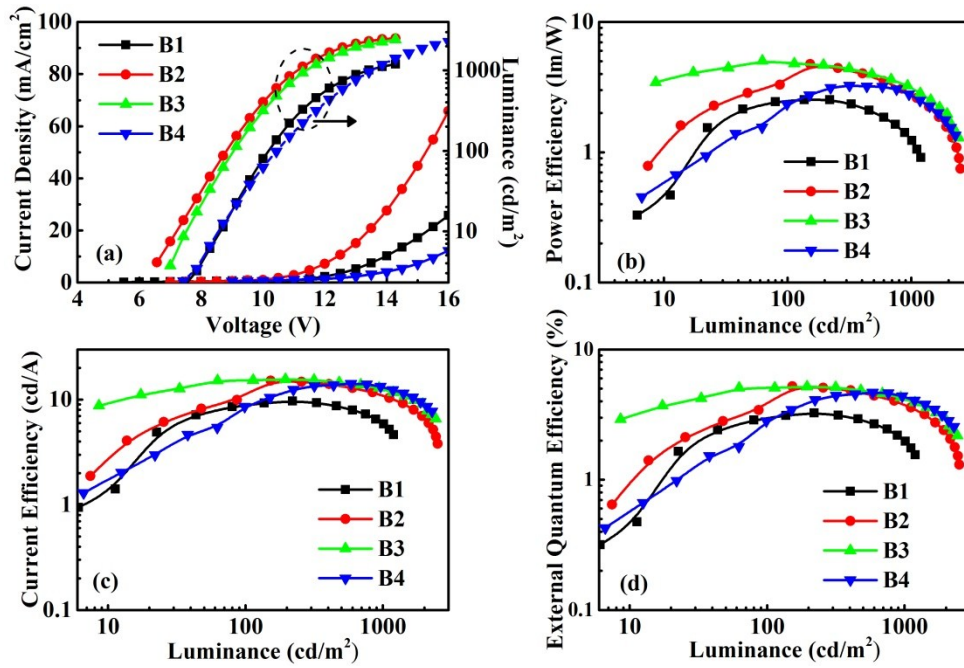

**Fig. S8.** (a) Current density–voltage–luminance ( $J$ – $V$ – $L$ ) characteristics, (b) power efficiency versus luminance curves, (c) current efficiency versus luminance curves, and (d) external quantum efficiency versus luminance curves for Devices B1-B4.

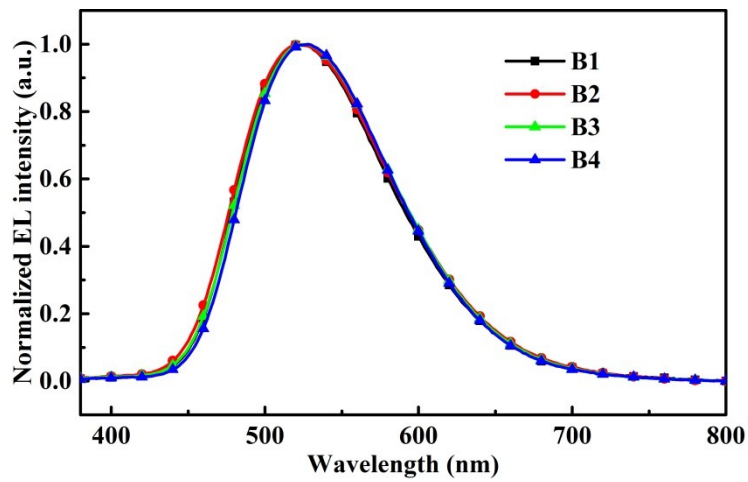

**Fig. S9.** Normalized EL spectra of Devices B1-B4.

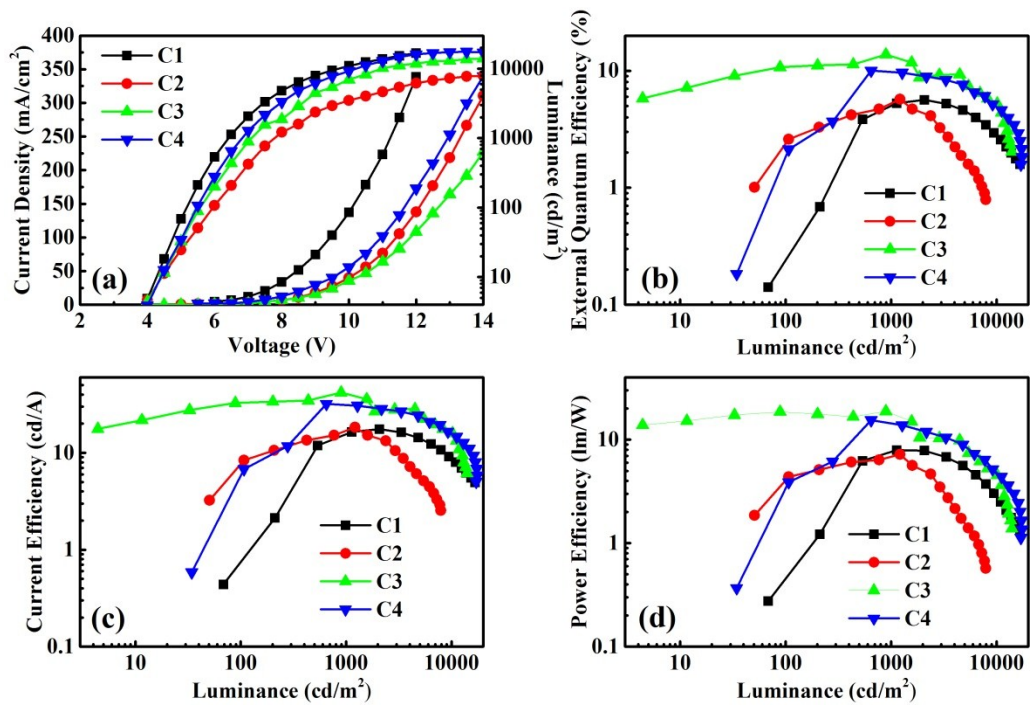

Fig. S10. (a) Current density–voltage–luminance ( $J$ – $V$ – $L$ ) characteristics, (b) external quantum efficiency versus luminance curves, (c) current efficiency versus luminance curves, and (d) power efficiency versus luminance curves for Devices C1-C4.

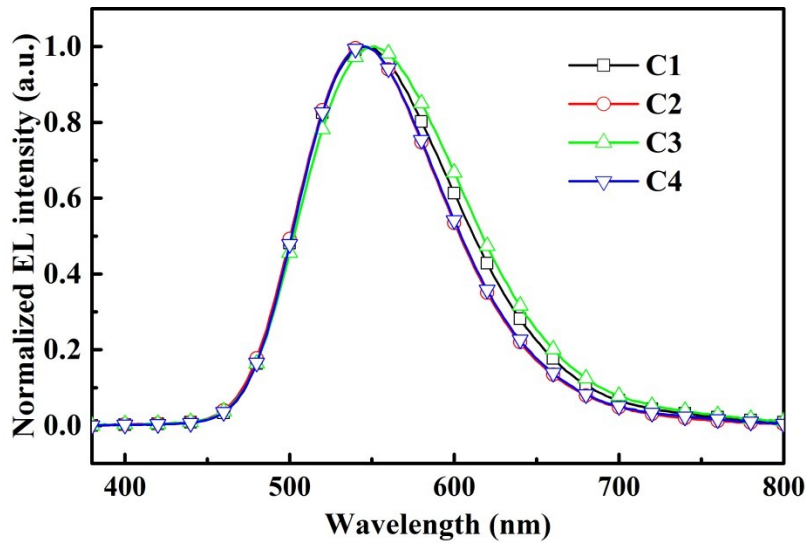

Fig. S11. Normalized EL spectra of Devices C1-C4.



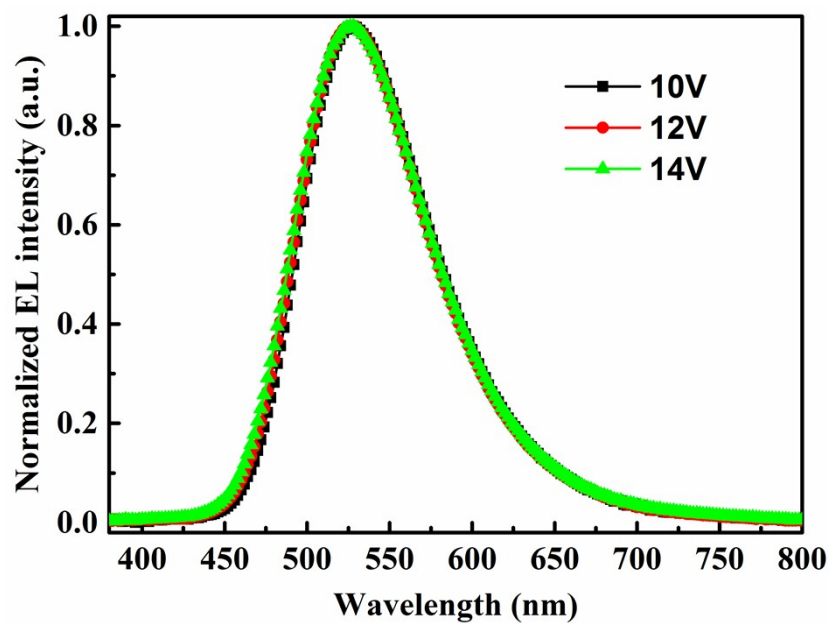

Fig. S12. Normalized EL spectra of the single layer device of ITO/PEDOT:PSS/CDE1/Ca/Al.

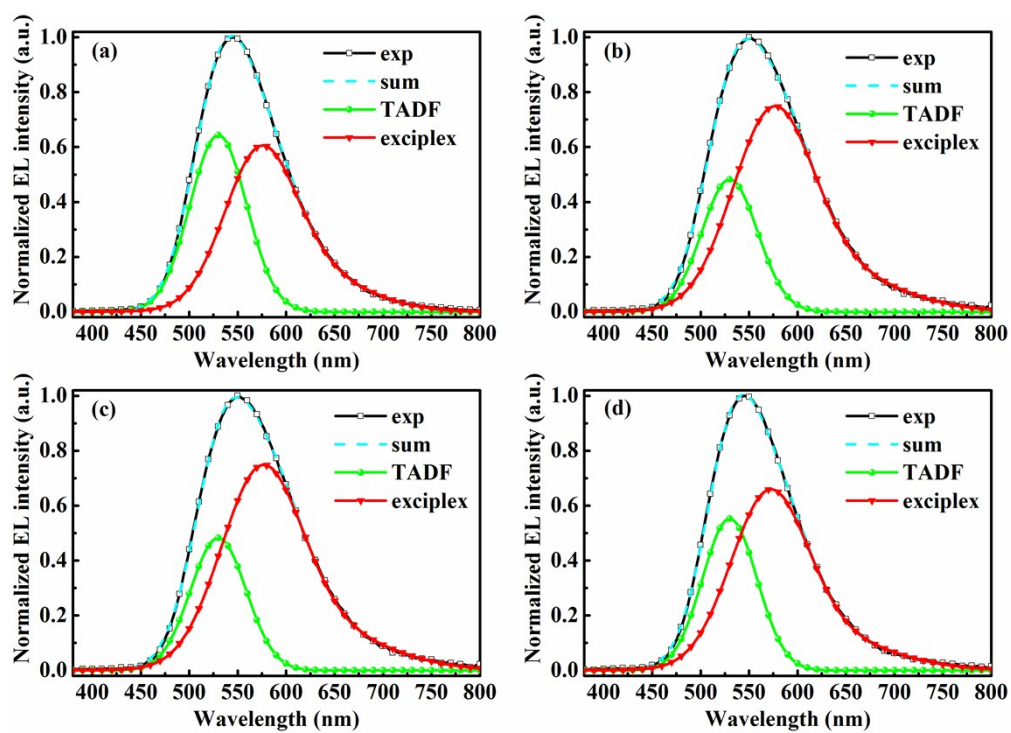

Fig. S13. Normalized EL spectra via Gaussian fitting of Devices C1 (a), C2 (b), C3 (c) and C4 (d).

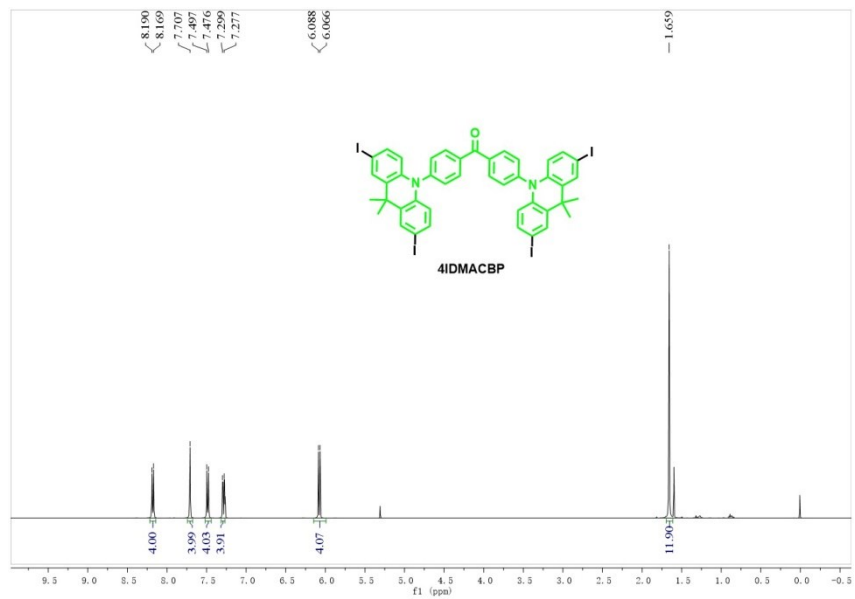

Fig. S14. <sup>1</sup>H NMR spectrum of 4IDMACBP.

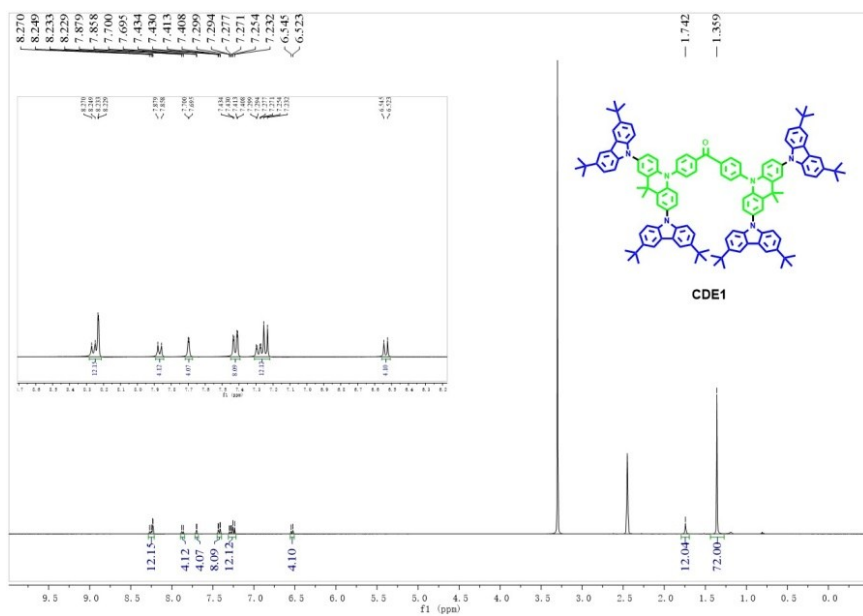

Fig. S15. <sup>1</sup>H NMR spectrum of CDE1.



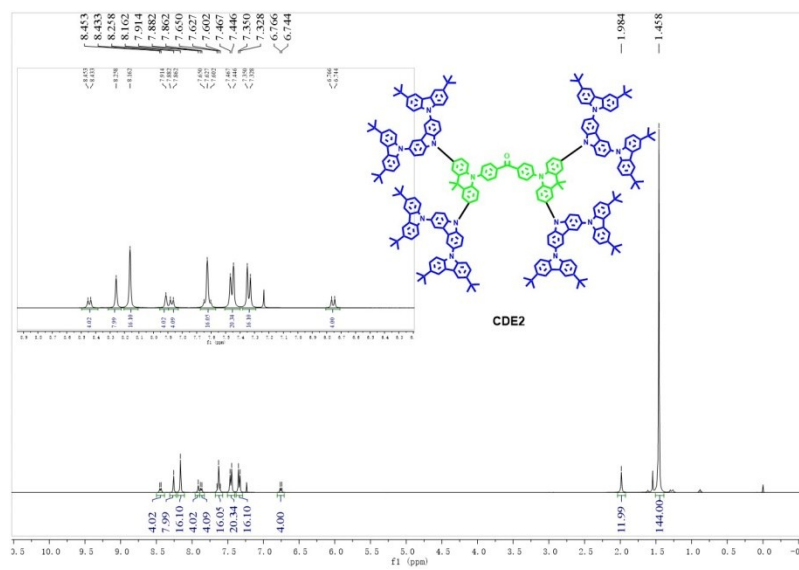

**Fig. S16.** <sup>1</sup>H NMR spectrum of CDE2.
